# Supplementary material
Source: PubMed Central journal article supplement (PMC6393183)

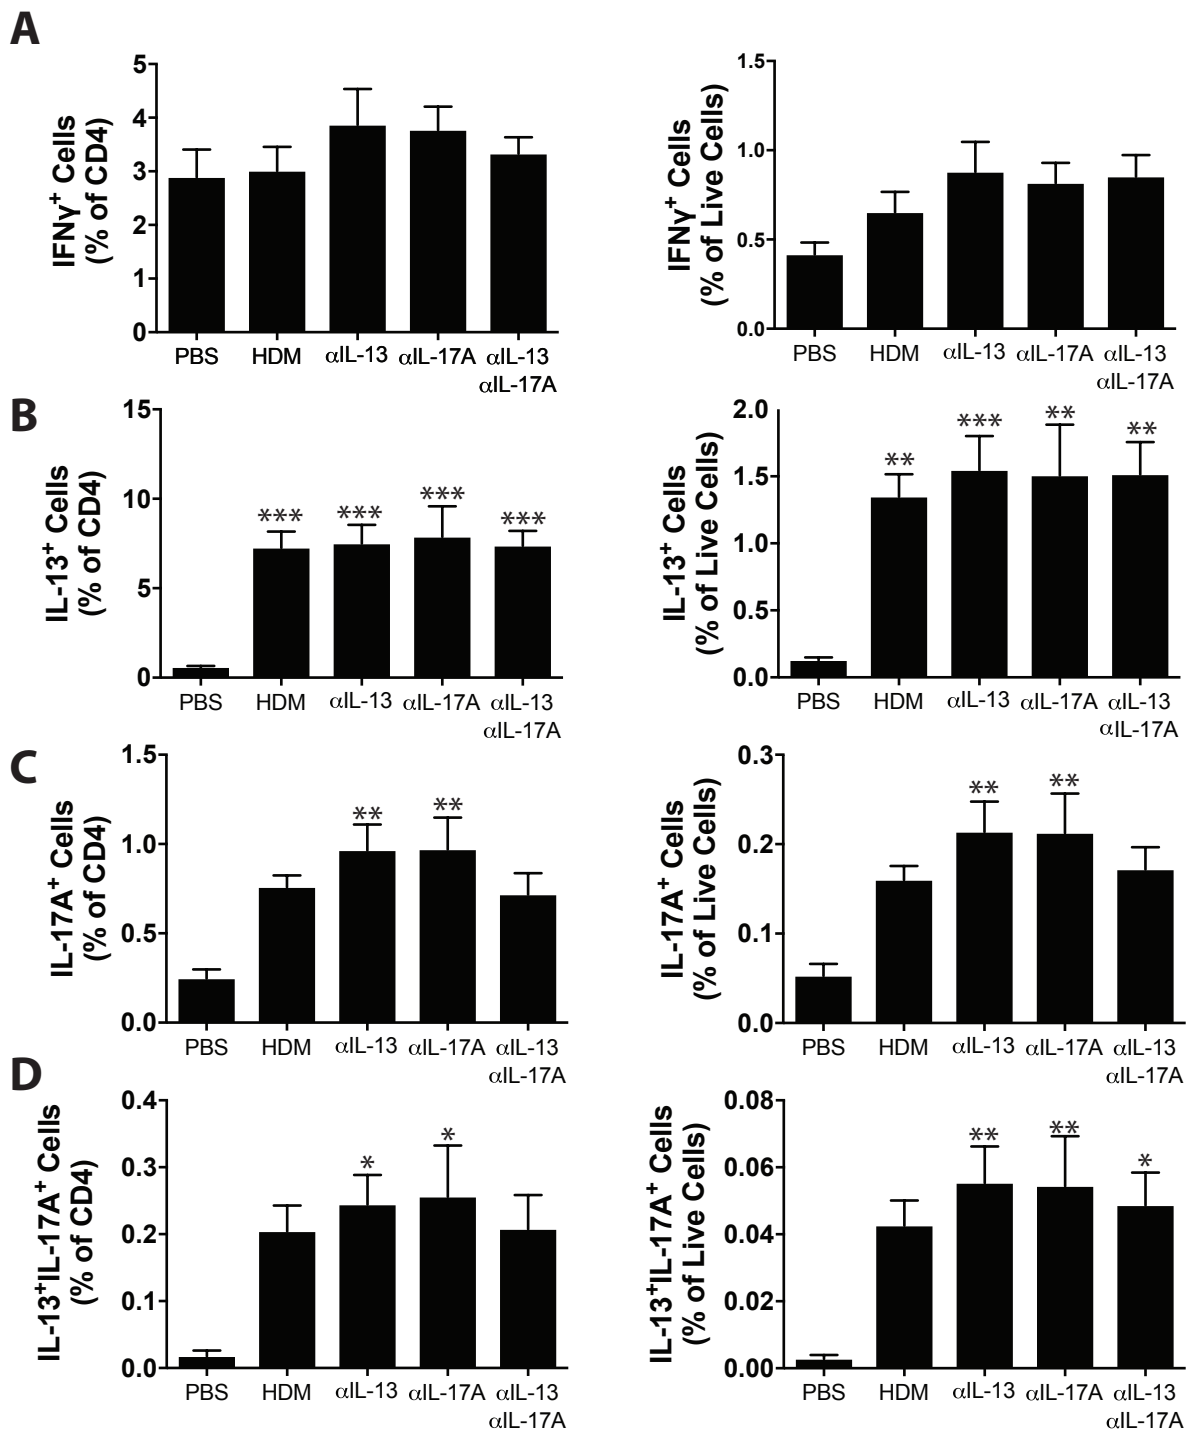

Kim et al, Supplementary Figure 1

Supplement: NIHMS994351-supplement-Supp_FigS1.pdf [file NIHMS994351-supplement-Supp_FigS1.pdf]

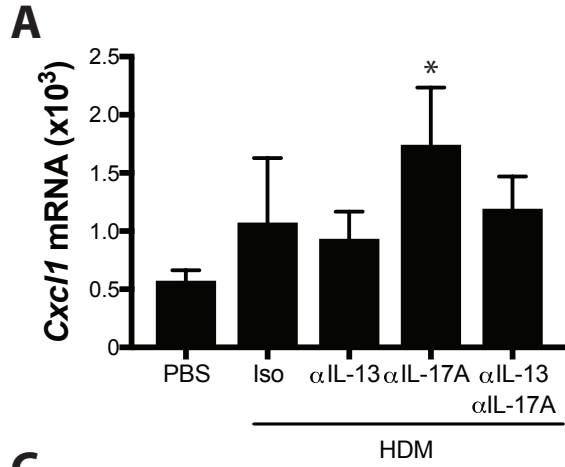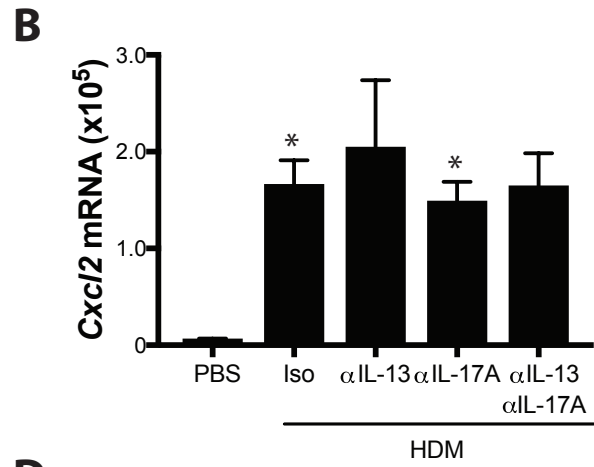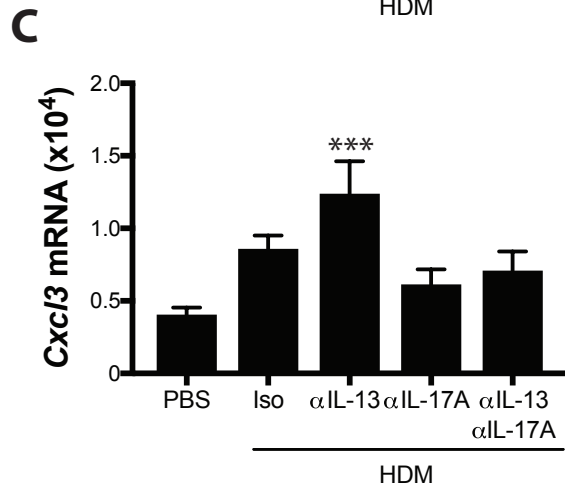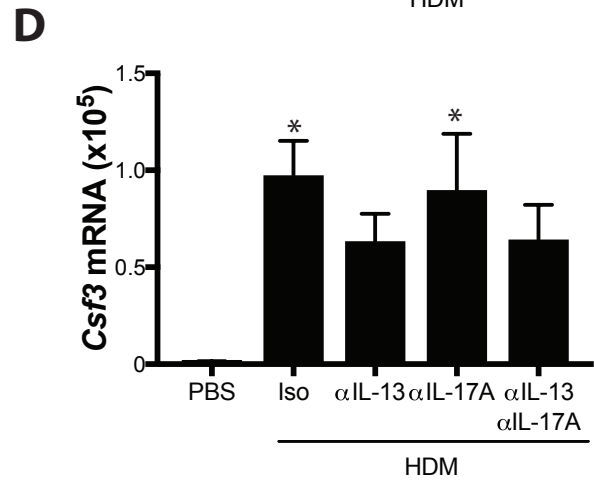

Kim et al, Supplementary Figure 2

Supplement: NIHMS994351-supplement-Supp_FigS2.pdf [file NIHMS994351-supplement-Supp_FigS2.pdf]
